# Supplementary material for: Magnetic relaxation in two chain-like Zn2Dy2Schiff base coordination polymers bridged by tetraoxolene and its one-electron reduced radical
Source: Royal Society of Chemistry journal article supplement (doi:10.1039/d1nj04299h), 2021-01-01
Supplement: d1nj04299h1.pdf [file d1nj04299h1.pdf]

Electronic Supplementary Material (ESI) for New Journal of Chemistry. This journal is © The Royal Society of Chemistry and the Centre National de la Recherche Scientifique 2021

*Supporting Information*

**Magnetic relaxation in two chain-like Zn<sub>2</sub>Dy<sub>2</sub> Schiff base coordination polymers bridged by tetraoxolene and its one-electron reduced radical**

*Cai-Ming Liu<sup>a,b\*</sup> and Xiang Hao<sup>a</sup>*

<sup>a</sup> *Beijing National Laboratory for Molecular Sciences, Center for Molecular Science, Key Laboratory of Organic Solids, Institute of Chemistry, CAS Research/Education Center for Excellence in Molecular Science, Chinese Academy of Sciences, Beijing 100190, China. E-mail: cmliu@iccas.ac.cn*

<sup>b</sup> *School of Chemical Sciences, University of Chinese Academy of Sciences, Beijing 100049, China.*

**Table S1.** Continuous shape measures calculation for Dy1 atom in **1**.

Dy1 structure

|          |        |                                    |
|----------|--------|------------------------------------|
| EP-9     | 1 D9h  | Enneagon                           |
| OPY-9    | 2 C8v  | Octagonal pyramid                  |
| HBPY-9   | 3 D7h  | Heptagonal bipyramid               |
| JTC-9    | 4 C3v  | Johnson triangular cupola J3       |
| JCCU-9   | 5 C4v  | Capped cube J8                     |
| CCU-9    | 6 C4v  | Spherical-relaxed capped cube      |
| JCSAPR-9 | 7 C4v  | Capped square antiprism J10        |
| CSAPR-9  | 8 C4v  | Spherical capped square antiprism  |
| JTCTPR-9 | 9 D3h  | Tricapped trigonal prism J51       |
| TCTPR-9  | 10 D3h | Spherical tricapped trigonal prism |
| JTDIC-9  | 11 C3v | Tridiminished icosahedron J63      |
| HH-9     | 12 C2v | Hula-hoop                          |
| MFF-9    | 13 Cs  | Muffin                             |

| Structure [ML9] | EP-9    | OPY-9   | HBPY-9  | JTC-9   | JCCU-9  | CCU-9  | JCSAPR-9 | CSAPR-9 | JTCTPR-9 | TCTPR-9 | JTDIC-9 | HH-9   | MFF-9                 |
|-----------------|---------|---------|---------|---------|---------|--------|----------|---------|----------|---------|---------|--------|-----------------------|
| ABOXIY,         | 36.639, | 22.989, | 18.848, | 15.565, | 10.777, | 9.076, | 1.640,   | 1.147,  | 3.407,   | 1.777,  | 12.575, | 9.054, | <a href="#">0.983</a> |

**Table S2.** Continuous shape measures calculation for Dy2 atom in **1**.

Dy2 structure

|          |        |                                    |
|----------|--------|------------------------------------|
| EP-9     | 1 D9h  | Enneagon                           |
| OPY-9    | 2 C8v  | Octagonal pyramid                  |
| HBPY-9   | 3 D7h  | Heptagonal bipyramid               |
| JTC-9    | 4 C3v  | Johnson triangular cupola J3       |
| JCCU-9   | 5 C4v  | Capped cube J8                     |
| CCU-9    | 6 C4v  | Spherical-relaxed capped cube      |
| JCSAPR-9 | 7 C4v  | Capped square antiprism J10        |
| CSAPR-9  | 8 C4v  | Spherical capped square antiprism  |
| JTCTPR-9 | 9 D3h  | Tricapped trigonal prism J51       |
| TCTPR-9  | 10 D3h | Spherical tricapped trigonal prism |
| JTDIC-9  | 11 C3v | Tridiminished icosahedron J63      |
| HH-9     | 12 C2v | Hula-hoop                          |
| MFF-9    | 13 Cs  | Muffin                             |

| Structure [ML9] | EP-9    | OPY-9   | HBPY-9  | JTC-9   | JCCU-9  | CCU-9  | JCSAPR-9 | CSAPR-9 | JTCTPR-9 | TCTPR-9 | JTDIC-9 | HH-9   | MFF-9                 |
|-----------------|---------|---------|---------|---------|---------|--------|----------|---------|----------|---------|---------|--------|-----------------------|
| ABOXIY,         | 35.080, | 23.099, | 17.937, | 15.686, | 11.046, | 9.393, | 2.433,   | 1.795,  | 3.713,   | 2.698,  | 13.592, | 7.728, | <a href="#">1.261</a> |

**Table S3.** Continuous shape measures calculation for Dy1 atom in **2**.

Dy1 structure

|          |        |                                    |
|----------|--------|------------------------------------|
| EP-9     | 1 D9h  | Enneagon                           |
| OPY-9    | 2 C8v  | Octagonal pyramid                  |
| HBPY-9   | 3 D7h  | Heptagonal bipyramid               |
| JTC-9    | 4 C3v  | Johnson triangular cupola J3       |
| JCCU-9   | 5 C4v  | Capped cube J8                     |
| CCU-9    | 6 C4v  | Spherical-relaxed capped cube      |
| JCSAPR-9 | 7 C4v  | Capped square antiprism J10        |
| CSAPR-9  | 8 C4v  | Spherical capped square antiprism  |
| JTCTPR-9 | 9 D3h  | Tricapped trigonal prism J51       |
| TCTPR-9  | 10 D3h | Spherical tricapped trigonal prism |
| JTDIC-9  | 11 C3v | Tridiminished icosahedron J63      |
| HH-9     | 12 C2v | Hula-hoop                          |
| MFF-9    | 13 Cs  | Muffin                             |

|                 |         |         |         |         |         |        |          |         |          |         |         |        |              |
|-----------------|---------|---------|---------|---------|---------|--------|----------|---------|----------|---------|---------|--------|--------------|
| Structure [ML9] | EP-9    | OPY-9   | HBPY-9  | JTC-9   | JCCU-9  | CCU-9  | JCSAPR-9 | CSAPR-9 | JTCTPR-9 | TCTPR-9 | JTDIC-9 | HH-9   | <b>MFF-9</b> |
| ABOXIY,         | 36.361, | 23.009, | 18.393, | 15.770, | 10.589, | 9.526, | 1.567,   | 1.092,  | 3.288,   | 1.750,  | 12.605, | 9.342, | <b>1.019</b> |

**Table S4.** Continuous shape measures calculation for Dy2 atom in **2**.

Dy2 structure

|          |        |                                    |
|----------|--------|------------------------------------|
| EP-9     | 1 D9h  | Enneagon                           |
| OPY-9    | 2 C8v  | Octagonal pyramid                  |
| HBPY-9   | 3 D7h  | Heptagonal bipyramid               |
| JTC-9    | 4 C3v  | Johnson triangular cupola J3       |
| JCCU-9   | 5 C4v  | Capped cube J8                     |
| CCU-9    | 6 C4v  | Spherical-relaxed capped cube      |
| JCSAPR-9 | 7 C4v  | Capped square antiprism J10        |
| CSAPR-9  | 8 C4v  | Spherical capped square antiprism  |
| JTCTPR-9 | 9 D3h  | Tricapped trigonal prism J51       |
| TCTPR-9  | 10 D3h | Spherical tricapped trigonal prism |
| JTDIC-9  | 11 C3v | Tridiminished icosahedron J63      |
| HH-9     | 12 C2v | Hula-hoop                          |
| MFF-9    | 13 Cs  | Muffin                             |

|                 |         |         |         |         |         |        |          |         |          |         |         |        |              |
|-----------------|---------|---------|---------|---------|---------|--------|----------|---------|----------|---------|---------|--------|--------------|
| Structure [ML9] | EP-9    | OPY-9   | HBPY-9  | JTC-9   | JCCU-9  | CCU-9  | JCSAPR-9 | CSAPR-9 | JTCTPR-9 | TCTPR-9 | JTDIC-9 | HH-9   | <b>MFF-9</b> |
| ABOXIY,         | 36.361, | 23.009, | 18.393, | 15.770, | 10.589, | 9.526, | 1.567,   | 1.092,  | 3.288,   | 1.750,  | 12.605, | 9.342, | <b>1.305</b> |

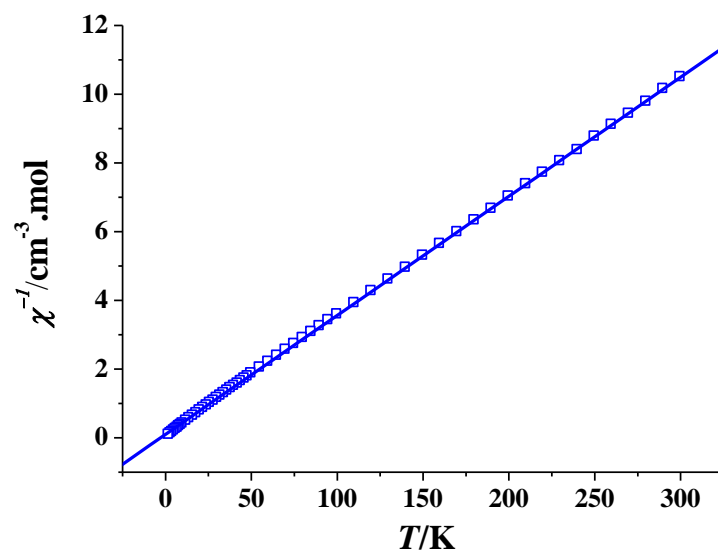

**Fig. S1.**  $1/\chi$  versus  $T$  plot of **1**.

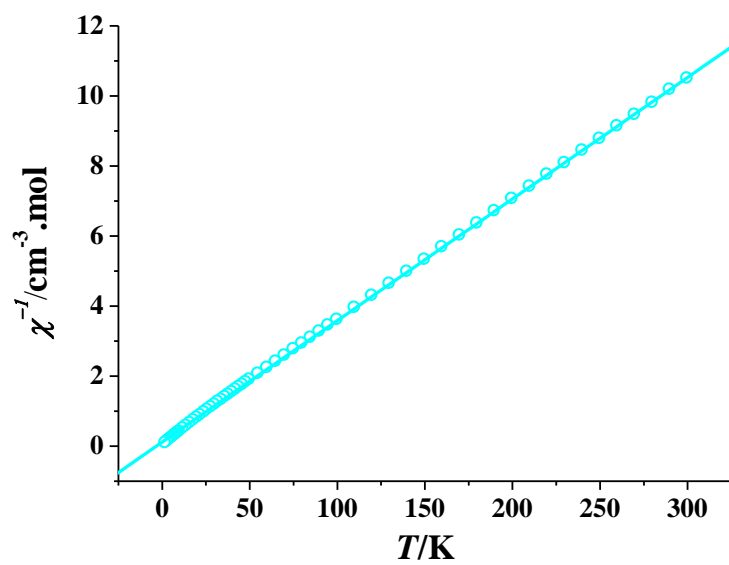

**Fig. S2.**  $1/\chi$  versus  $T$  plot of **2**.

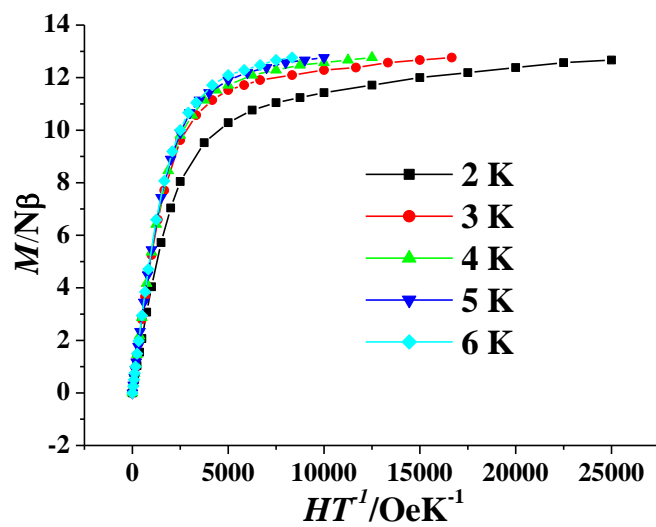

**Fig. S3.**  $M$  versus  $H/T$  plots at 2-6 K of 1.

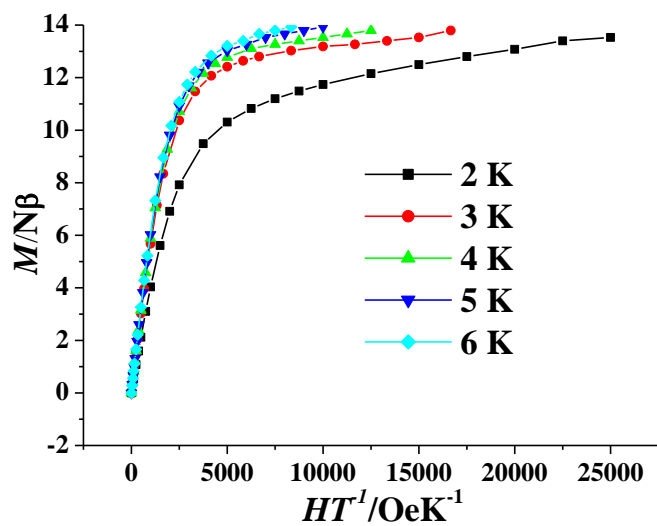

**Fig. S4.**  $M$  versus  $H/T$  plots at 2-6 K of 2.

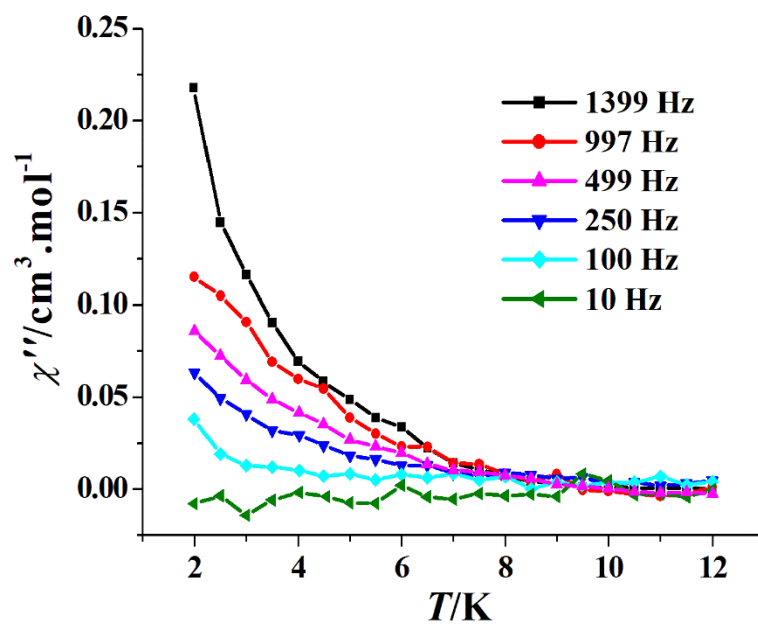

**Fig. S5.** Temperature dependence of  $\chi''$  for **1** under zero dc field.

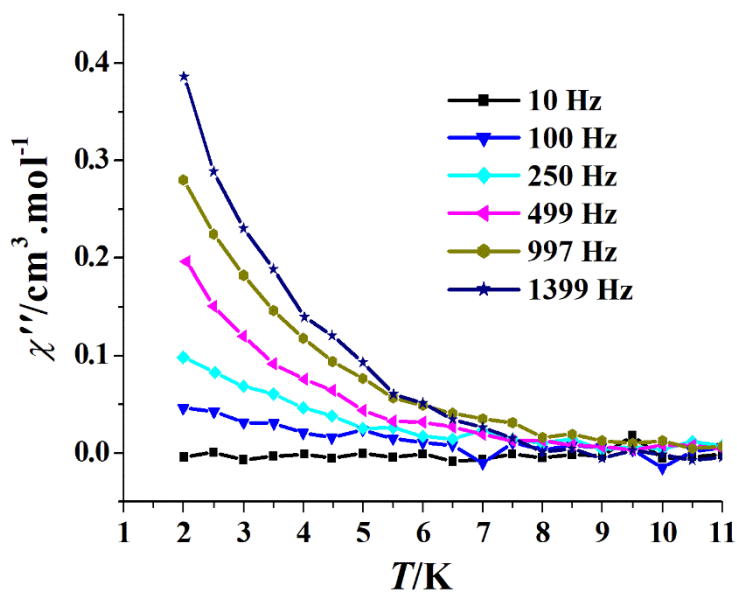

**Fig. S6.** Temperature dependence of  $\chi''$  for **2** under zero dc field.

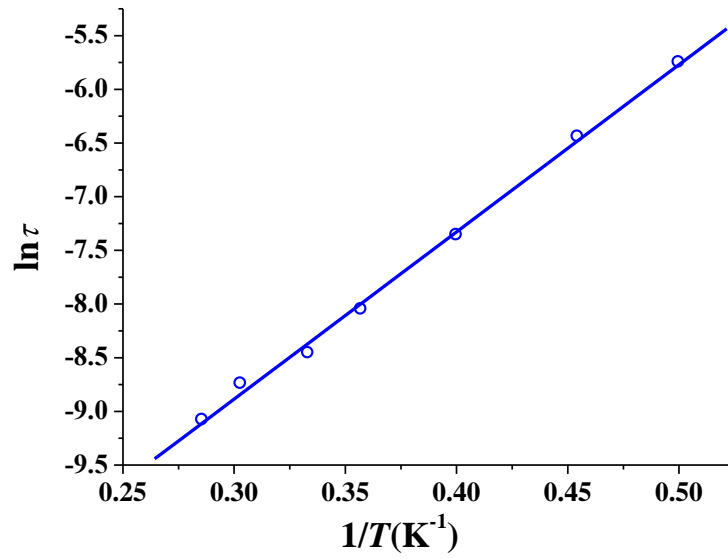

**Fig. S7.** Plot of  $\ln(\tau)$  versus  $1/T$  for **1** ( $H_{\text{dc}} = 1500$  Oe), the solid line represents the best fitting with the Arrhenius law.

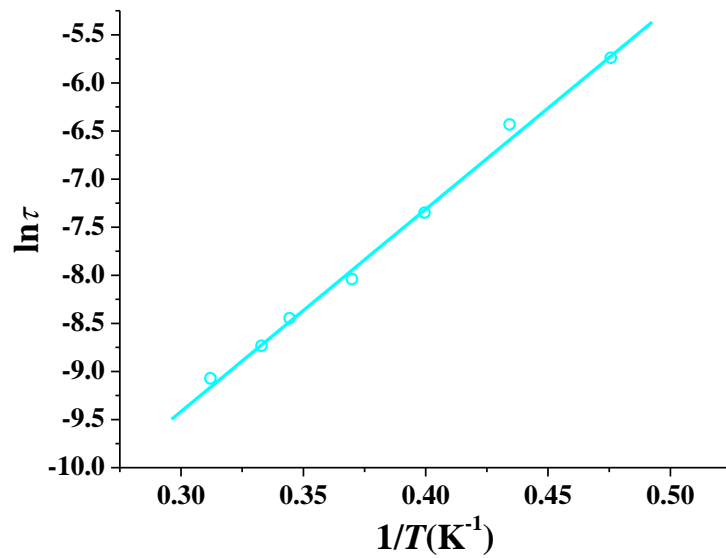

**Fig. S8.** Plot of  $\ln(\tau)$  versus  $1/T$  for **2** ( $H_{\text{dc}} = 1500$  Oe), the solid line represents the best fitting with the Arrhenius law.

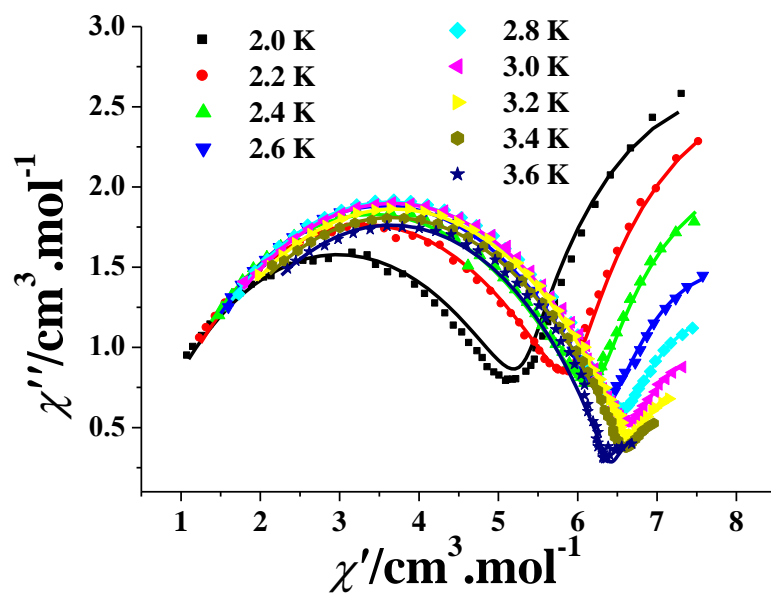

**Fig. S9.** Cole-Cole plots at 2.0-3.6 K for **1** ( $H_{\text{dc}} = 1500$  Oe and  $H_{\text{ac}} = 2.5$  Oe), the solid lines represent the best fitting with the sum of two modified Debye functions.

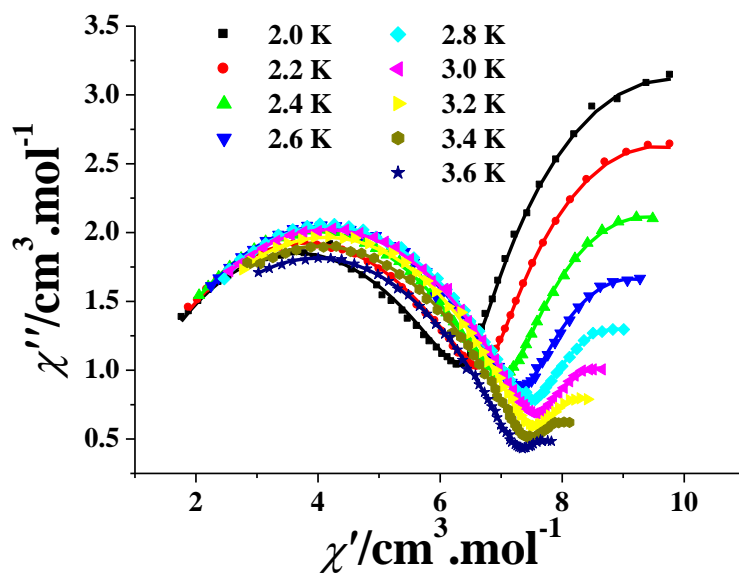

**Fig. S10.** Cole-Cole plots at 2.0-3.6 K for **2** ( $H_{\text{dc}} = 1500$  Oe and  $H_{\text{ac}} = 2.5$  Oe), the solid lines represent the best fitting with the sum of two modified Debye functions.



**Table S5.** Linear combination of two modified Debye model fitting parameters from 2.0 K to 3.6 K of **1** at 1500 Oe.

| $T(K)$ | $\chi_2(\text{cm}^3.\text{mol}^{-1})$ | $\chi_1(\text{cm}^3.\text{mol}^{-1})$ | $\chi_0(\text{cm}^3.\text{mol}^{-1})$ | $\tau_1(\text{s})$ | $\alpha_1$ | $\tau_2(\text{s})$ | $\alpha_2$ |
|--------|---------------------------------------|---------------------------------------|---------------------------------------|--------------------|------------|--------------------|------------|
| 2.0    | 11.10054                              | 5.28038                               | 0.32256                               | 0.21202            | 0.00737    | 0.00074            | 0.31356    |
| 2.2    | 10.49602                              | 5.40027                               | 0.42377                               | 0.25053            | 0.02296    | 0.00071            | 0.29922    |
| 2.4    | 10.44035                              | 4.4324                                | 0.38549                               | 0.26156            | 0.02995    | 0.00062            | 0.30714    |
| 2.6    | 9.38677                               | 3.24554                               | 0.46696                               | 0.20775            | 0.0098     | 0.00059            | 0.30184    |
| 2.8    | 8.96897                               | 2.70296                               | 0.48632                               | 0.22236            | 0.01498    | 0.00053            | 0.30564    |
| 3.0    | 8.49696                               | 2.19058                               | 0.50371                               | 0.22516            | 0.00687    | 0.00047            | 0.31094    |
| 3.2    | 8.17045                               | 1.89678                               | 0.54327                               | 0.25232            | 0.00014    | 0.00042            | 0.31828    |
| 3.4    | 7.68757                               | 1.52191                               | 0.57166                               | 0.23717            | 0.00009    | 0.00036            | 0.3244     |
| 3.6    | 7.30255                               | 1.49754                               | 0.58971                               | 0.26036            | 0.00003    | 0.00032            | 0.29545    |

**Table S6.** Linear combination of two modified Debye model fitting parameters from 2.0 K to 3.6 K of **2** at 1500 Oe.

| $T(K)$ | $\chi_2(\text{cm}^3.\text{mol}^{-1})$ | $\chi_1(\text{cm}^3.\text{mol}^{-1})$ | $\chi_0(\text{cm}^3.\text{mol}^{-1})$ | $\tau_1(\text{s})$ | $\alpha_1$ | $\tau_2(\text{s})$ | $\alpha_2$ |
|--------|---------------------------------------|---------------------------------------|---------------------------------------|--------------------|------------|--------------------|------------|
| 2.0    | 13.13252                              | 6.76395                               | 0.39132                               | 0.16448            | 0.03753    | 0.00048            | 0.33663    |
| 2.2    | 12.39254                              | 5.70179                               | 0.39942                               | 0.15192            | 0.03681    | 0.00046            | 0.34127    |
| 2.4    | 11.72278                              | 4.80594                               | 0.45508                               | 0.15776            | 0.05377    | 0.00043            | 0.33503    |
| 2.6    | 11.00678                              | 3.8953                                | 0.50343                               | 0.15506            | 0.05967    | 0.00041            | 0.33864    |
| 2.8    | 10.37649                              | 3.13763                               | 0.51235                               | 0.15715            | 0.06738    | 0.00037            | 0.34752    |
| 3.0    | 9.90424                               | 2.65131                               | 0.4995                                | 0.17512            | 0.10641    | 0.00033            | 0.35474    |
| 3.2    | 9.27892                               | 2.1066                                | 0.53543                               | 0.16297            | 0.08714    | 0.00029            | 0.36275    |
| 3.4    | 8.82681                               | 1.67405                               | 0.44631                               | 0.1713             | 0.10873    | 0.00025            | 0.37857    |
| 3.6    | 8.35111                               | 1.38775                               | 0.48582                               | 0.16695            | 0.10285    | 0.00022            | 0.38923    |
